# Supplementary material
Source: publisher figshare collection journal article supplement (https://brill.figshare.com/ndownloader/files/24613607)
Supplement: Supplementary file 1 [file 24613607]

**Appendix Six**

Presidential Letter of Transmittal of the Law of the Sea Convention, October 6, 1994

The White House, *October 6, 1994*.

*To the Senate of the United States*:

I transmit herewith, for the advice and consent of the Senate to accession, the United Nations Convention on the Law of the Sea, with Annexes, done at Montego Bay, December 10, 1982 (the “Convention”), and, for the advice and consent of the Senate to ratification, the Agreement Relating to the Implementation of Part XI of the United Nations Convention on the Law of the Sea of 10 December 1982, with Annex, adopted at New York, July 28, 1994 (the “Agreement”), and signed by the United States, subject to ratification, on July 29, 1994. Also transmitted for the information of the Senate is the report of the Department of State with respect to the Convention and Agreement, as well as Resolution II of Annex I and Annex II of the Final Act of the Third United Nations Conference on the Law of the Sea.

The United States has basic and enduring national interests in the oceans and has consistently taken the view that the full range of these interests is best protected through a widely accepted international framework governing uses of the sea. Since the late 1960s, the basic US strategy has been to conclude a comprehensive treaty on the law of the sea that will be respected by all countries. Each succeeding US Administration has recognized this as the cornerstone of US oceans policy.

Following adoption of the Convention in 1982, it has been the policy of the United States to act in a manner consistent with its provisions relating to traditional uses of the oceans and to encourage other countries to do likewise.

The primary benefits of the Convention to the United States include the following:

• The Convention advances the interests of the United States as a global maritime power. It preserves the right of the US military to use the world’s oceans to meet national security requirements and of commercial vessels to carry sea‑going cargoes. It achieves this, *inter alia*, by stabilizing the breadth of the territorial sea at 12 nautical miles; by setting forth navigation regimes of innocent passage in the territorial sea, transit passage in straits used for international navigation, and archipelagic sea lanes passage; and by reaffirming the traditional freedoms of navigation and overflight in the exclusive economic zone and the high seas beyond.

• The Convention advances the interests of the United States as a coastal State. It achieves this, i*nter alia*, by providing for an exclusive economic zone out to 200 nautical miles from shore and by securing our rights regarding resources and artificial islands, installations and structures for economic purposes over the full extent of the continental shelf. These provisions fully comport with US oil and gas leasing practices, domestic management of coastal fishery resources, and international fisheries agreements.

• As a far-reaching environmental accord addressing vessel source pollution, pollution from seabed activities, ocean dumping, and land-based sources of marine pollution, the Convention promotes continuing improvement in the health of the world’s oceans.

• In light of the essential role of marine scientific research in understanding and managing the oceans, the Convention sets forth criteria and procedures to promote access to marine areas, including coastal waters, for research activities.

• The Convention facilitates solutions to the increasingly complex problems of the uses of the ocean—solutions that respect the essential balance between our interests as both a coastal and a maritime nation.

• Through its dispute settlement provisions, the Convention provides for mechanisms to enhance compliance by Parties with the Convention's provisions.

Notwithstanding these beneficial provisions of the Convention and bipartisan support for them, the United States decided not to sign the Convention in 1982 because of flaws in the regime it would have established for managing the development of mineral resources of the seabed beyond national jurisdiction (Part XI). It has been the consistent view of successive US Administrations that this deep seabed mining regime was inadequate and in need of reform if the United States was ever to become a Party to the Convention.

Such reform has now been achieved. The Agreement, signed by the United States on July 29, 1994, fundamentally changes the deep seabed mining regime of the Convention. As described in the report of the Secretary of State, the Agreement meets the objections the United States and other industrialized nations previously expressed to Part XI. It promises to provide a stable and internationally recognized framework for mining to proceed in response to future demand for minerals.

Early adherence by the United States to the Convention and the Agreement is important to maintain a stable legal regime for all uses of the sea, which covers more than 70 percent of the surface of the globe. Maintenance of such stability is vital to US national security and economic strength.

I therefore recommend that the Senate give early and favorable consideration to the Convention and to the Agreement and give its advice and consent to accession to the Convention and to ratification of the Agreement. Should the Senate give such advice and consent, I intend to exercise the options concerning dispute settlement recommended in the accompanying report of the Secretary of State.

William J. Clinton.

Sen. Treaty Doc. 103-39, pp. III-IV; 104 Cong. Rec. S14468, Oct. 6, 1994; 5 US State Dep’t Dispatch, No. 42, Oct. 17, 1994; 6 US State Dep’t Dispatch Supp. No. 1, Feb. 1995, at 1; 7 Geo. Int’l Envtl. L. Rev. 77 (1994); 34 ILM 1396 (1995), *available at* <https://www.foreign.senate.gov/imo/media/doc/treaty_103-39.pdf>.
